# Supplementary material for: Prenatal cell-free DNA testing of women with pregnancy-associated cancer: a retrospective cross-sectional study
Source: PubMed Central journal article supplement — Lancet Reg Health Eur. 2024 Aug 7;45:101024. doi: 10.1016/j.lanepe.2024.101024 (PMC11363838; doi:10.1016/j.lanepe.2024.101024), 2024-08-07
Supplement: mmc1.pdf [file mmc1.pdf]

## Supplementary Material

### **Prenatal cell-free DNA testing of women with pregnancy-associated cancer: a retrospective cross-sectional study**

#### Table of content

|                                                                                                                     |      |    |
|---------------------------------------------------------------------------------------------------------------------|------|----|
| 1. Supplemental Table 1: The “Maastricht criteria” to interpret NIPT results for suspicion of a maternal malignancy | Page | 2  |
| 2. Supplemental Table 2: NIPT results of all patients with tumour type and stage (n=65)                             |      | 3  |
| 3. Supplemental Table 3: Symptoms of disease at diagnosis (n=65)                                                    |      | 7  |
| 4. Supplemental Figure 1: Highlighted WISECONDOR NIPT results                                                       |      | 8  |
| 5. Supplemental reference list                                                                                      |      | 11 |

**Supplemental Table 1: The “Maastricht criteria” to interpret NIPT results for suspicion of a maternal malignancy (1).**

| Criteria                                                                                                                                                                                                                                                                                                                                                                                                                                                                                                                                      | Score              |
|-----------------------------------------------------------------------------------------------------------------------------------------------------------------------------------------------------------------------------------------------------------------------------------------------------------------------------------------------------------------------------------------------------------------------------------------------------------------------------------------------------------------------------------------------|--------------------|
| Number of aberrations <sup>a</sup> >2                                                                                                                                                                                                                                                                                                                                                                                                                                                                                                         | 3                  |
| Monosomy                                                                                                                                                                                                                                                                                                                                                                                                                                                                                                                                      | 2                  |
| Segmental aneuploidies with presence of oncogene or tumour suppressor-gene                                                                                                                                                                                                                                                                                                                                                                                                                                                                    | 2                  |
| Trisomy 12                                                                                                                                                                                                                                                                                                                                                                                                                                                                                                                                    | 2                  |
| Trisomy 9                                                                                                                                                                                                                                                                                                                                                                                                                                                                                                                                     | 2                  |
| Trisomy 8                                                                                                                                                                                                                                                                                                                                                                                                                                                                                                                                     | 1                  |
| Two trisomies (in total)                                                                                                                                                                                                                                                                                                                                                                                                                                                                                                                      | 1                  |
| High significance score of aberration <sup>a,b</sup>                                                                                                                                                                                                                                                                                                                                                                                                                                                                                          | 1                  |
| <b>Malignancy suspicious-NIPT</b>                                                                                                                                                                                                                                                                                                                                                                                                                                                                                                             | <b>Total score</b> |
| No suspicion                                                                                                                                                                                                                                                                                                                                                                                                                                                                                                                                  | <2                 |
| Mild suspicion                                                                                                                                                                                                                                                                                                                                                                                                                                                                                                                                | 2                  |
| Strong suspicion                                                                                                                                                                                                                                                                                                                                                                                                                                                                                                                              | ≥3                 |
| <p>Multiple criteria may apply to one NIPT result, individual scores are then counted together.<br/> <sup>a</sup> Aberration: any type of aberration, i.e. partial duplications (gains), partial deletions (losses), trisomy, monosomy.<br/> <sup>b</sup> High significance score based on the number of standard deviations from the mean value of the reference, dependent of the algorithm used. For example a Stouffer z-score of segmental aneuploidy or a t-statistic of aneuploidy <math>\leq -10</math> or <math>\geq +10</math>.</p> |                    |

**Supplemental Table 2: NIPT results of all patients with tumour type and stage (n=65)**

| Study number                | Tumour type                                    | Tumour stage at diagnosis | Time between NIPT and diagnosis (days) | Genome-wide / targeted NIPT | Initial NIPT result        | Reviewed NIPT result# - "Maastricht criteria" score | Details reviewed NIPT, "Maastricht criteria" score                               |
|-----------------------------|------------------------------------------------|---------------------------|----------------------------------------|-----------------------------|----------------------------|-----------------------------------------------------|----------------------------------------------------------------------------------|
| <b>Breast cancer (n=20)</b> | <u>0</u>                                       |                           |                                        |                             |                            |                                                     |                                                                                  |
| NIPT-09                     | Breast cancer, Hormone positive, HER2 negative | Stage I                   | 31                                     | GW                          | Non-suspicious             | Score 0:<br>No suspicion                            | N/A                                                                              |
| NIPT-14                     | Breast cancer, Triple negative                 | Stage I                   | 47                                     | GW                          | Non-suspicious             | Score 0:<br>No suspicion                            | N/A                                                                              |
| NIPT-20                     | Breast cancer, Triple negative                 | Stage II                  | 101                                    | GW                          | Non-suspicious             | Score 0:<br>No suspicion                            | N/A                                                                              |
| NIPT-21                     | Breast cancer, Hormone positive, HER2 negative | Stage II                  | 189                                    | GW                          | Non-suspicious             | Score 0:<br>No suspicion                            | N/A                                                                              |
| NIPT-26                     | Breast cancer, Triple negative                 | Stage II                  | 27                                     | GW                          | Suspicious of a malignancy | Score 5:<br>Strong suspicion of malignancy          | Number of alterations: 5<br>(part)dup10p ( <i>CCNY</i> gene, <i>MAP3K8</i> gene) |
| NIPT-32                     | Breast cancer, Triple negative                 | Stage II                  | 43                                     | GW                          | Non-suspicious             | Score 0:<br>No suspicion                            | N/A                                                                              |
| NIPT-35                     | Breast cancer, Triple negative                 | Stage II                  | 2                                      | GW                          | Non-suspicious             | Score 0:<br>No suspicion                            | N/A                                                                              |
| NIPT-36                     | Breast cancer, Triple negative                 | Stage II                  | 94                                     | Targeted                    | Non-suspicious             | Score 0:<br>No suspicion                            | N/A                                                                              |
| NIPT-37                     | Breast cancer, Hormone positive, HER2 negative | Stage II                  | 95                                     | GW                          | Non-suspicious             | Score 0:<br>No suspicion                            | N/A                                                                              |
| NIPT-39                     | Breast cancer, Hormone positive, HER2 negative | Stage II                  | 96                                     | GW                          | Non-suspicious             | Score 0:<br>No suspicion                            | N/A                                                                              |
| NIPT-40                     | Breast cancer, Triple negative                 | Stage II                  | 69                                     | GW                          | Non-suspicious             | Score 0:<br>No suspicion                            | N/A                                                                              |
| NIPT-41                     | Breast cancer, Triple negative                 | Stage II                  | 117                                    | GW                          | Non-suspicious             | Score 0:<br>No suspicion                            | N/A                                                                              |
| NIPT-47                     | Breast cancer                                  | Stage II                  | 104                                    | GW                          | Non-suspicious             | Score 0:<br>No suspicion                            | N/A                                                                              |
| NIPT-56                     | Breast cancer, Hormone positive, HER2 positive | Stage II                  | 6                                      | GW                          | Non-suspicious             | Score 0:<br>No suspicion                            | N/A                                                                              |
| NIPT-10                     | Breast cancer, Hormone positive, HER2 negative | Stage III                 | 78                                     | GW                          | Non-suspicious             | Score 0:<br>No suspicion                            | N/A                                                                              |
| NIPT-16                     | Breast cancer, Hormone positive, HER2 positive | Stage III                 | 73                                     | GW                          | Non-suspicious             | Score 0:<br>No suspicion                            | N/A                                                                              |
| NIPT-54                     | Breast cancer, Triple negative                 | Stage III                 | 174                                    | GW                          | Non-suspicious             | Score 0:<br>No suspicion                            | N/A                                                                              |
| NIPT-34*                    | Breast cancer, Triple negative                 | Stage IV                  | 22                                     | GW                          | Suspicious of a malignancy | Score 6<br>Strong suspicion of malignancy           | Number of alterations: 15<br>M18<br>(part)dup13q (z-score 15,9)                  |

|                                     |                                                |           |       |          |                                                                                     |                                            |                                                                                                                                                                                 |
|-------------------------------------|------------------------------------------------|-----------|-------|----------|-------------------------------------------------------------------------------------|--------------------------------------------|---------------------------------------------------------------------------------------------------------------------------------------------------------------------------------|
| NIPT-19                             | Breast cancer, Triple negative                 | Stage IV  | 175   | Targeted | Non-suspicious                                                                      | Score 0:<br>No suspicion                   | N/A                                                                                                                                                                             |
| NIPT-44                             | Breast cancer, Hormone negative, HER2 positive | Stage IV  | 57    | Targeted | Non-suspicious                                                                      | Score 0:<br>No suspicion                   | N/A                                                                                                                                                                             |
| <b>Gynaecological cancer (n=19)</b> |                                                |           |       |          |                                                                                     |                                            |                                                                                                                                                                                 |
| NIPT-01                             | Cervical cancer, squamous cell carcinoma       | Stage I   | 118   | GW       | Non-suspicious                                                                      | Score 0:<br>No suspicion                   | N/A                                                                                                                                                                             |
| NIPT-02                             | Cervical cancer, adenocarcinoma                | Stage I   | 145   | GW       | Non-suspicious                                                                      | Score 0:<br>No suspicion                   | N/A                                                                                                                                                                             |
| NIPT-03                             | Cervical cancer, squamous cell carcinoma       | Stage I   | 115   | GW       | Non-suspicious                                                                      | Score 0:<br>No suspicion                   | N/A                                                                                                                                                                             |
| NIPT-05                             | Cervical cancer squamous cell carcinoma        | Stage I   | 0     | Targeted | Non-suspicious                                                                      | Score 0:<br>No suspicion                   | N/A                                                                                                                                                                             |
| NIPT-24                             | Cervical cancer, squamous cell carcinoma       | Stage I   | 148   | GW       | Non-suspicious                                                                      | Score 0:<br>No suspicion                   | N/A                                                                                                                                                                             |
| NIPT-33                             | Cervical cancer, squamous cell carcinoma       | Stage I   | 97    | GW       | Non-suspicious                                                                      | Score 0:<br>No suspicion                   | N/A                                                                                                                                                                             |
| NIPT-42                             | Cervical cancer, squamous cell carcinoma       | Stage I   | 22    | GW       | Non-suspicious                                                                      | Score 0:<br>No suspicion                   | N/A                                                                                                                                                                             |
| NIPT-59                             | Cervical cancer, adenocarcinoma                | Stage I   | 104   | GW       | Non-suspicious                                                                      | Score 0:<br>No suspicion                   | N/A                                                                                                                                                                             |
| NIPT-63                             | Cervical cancer, squamous cell carcinoma       | Stage I   | 212** | GW       | Non-suspicious                                                                      | Score 0:<br>No suspicion                   | N/A                                                                                                                                                                             |
| NIPT-66                             | Cervical cancer, adenocarcinoma                | Stage I   | 165   | GW       | Non-suspicious                                                                      | Score 0:<br>No suspicion                   | N/A                                                                                                                                                                             |
| NIPT-53                             | Cervical cancer, squamous cell carcinoma       | Stage II  | 66    | Targeted | Non-suspicious                                                                      | Score 0:<br>No suspicion                   | N/A                                                                                                                                                                             |
| NIPT-60                             | Cervical cancer, adenocarcinoma                | Stage II  | 35    | Targeted | Non-suspicious                                                                      | Score 0:<br>No suspicion                   | N/A                                                                                                                                                                             |
| NIPT-65                             | Cervical cancer, squamous cell carcinoma       | Stage II  | 11    | GW       | Non-suspicious                                                                      | Score 0:<br>No suspicion                   | N/A                                                                                                                                                                             |
| NIPT-67                             | Cervical cancer, adenocarcinoma                | Stage II  | 187** | GW       | Non-suspicious                                                                      | Score 0:<br>No suspicion                   | Possible related CNV but below lower limit of windowed bin test: 3q26 gain detected (7Mb), <i>MECOM</i> , <i>PRKCI</i> , <i>TERC</i> genes, associated with cervical cancer (2) |
| NIPT-50                             | Cervical cancer, squamous cell carcinoma       | Stage III | 100   | GW       | Aberrant, other than suspicious of a malignancy (structural chromosomal aberration) | Score: 2<br>Mild suspicion of malignancy   | dup9p ( <i>JAK2</i> , <i>CD274</i> , <i>PDCD1LG2</i> genes)                                                                                                                     |
| NIPT-61                             | Cervical cancer, squamous cell carcinoma       | Stage III | 402** | GW       | Non-suspicious                                                                      | Score 0:<br>No suspicion                   | N/A                                                                                                                                                                             |
| NIPT-45                             | Ovarian cancer, high grade serous epithelial   | Stage I   | 19    | Targeted | Non-suspicious                                                                      | Score 0:<br>No suspicion                   | N/A                                                                                                                                                                             |
| NIPT-43                             | Ovarian cancer, high grade serous epithelial   | Stage III | 25    | GW       | Suspicious of a malignancy                                                          | Score: 8<br>Strong suspicion of malignancy | Number of alterations: 28<br>M13, M21, M22                                                                                                                                      |

|                                     |                                                                |           |       |          |                                                                                     |                                             |                                                                                                                                                                                                                                       |
|-------------------------------------|----------------------------------------------------------------|-----------|-------|----------|-------------------------------------------------------------------------------------|---------------------------------------------|---------------------------------------------------------------------------------------------------------------------------------------------------------------------------------------------------------------------------------------|
|                                     |                                                                |           |       |          |                                                                                     |                                             | Recurrent CNVs in ovarian cancer and this NIPT: (part)dup1q, (part) dup3q, (part)dup8q, (part)dup20q, del22, del6q (3). (part)dup8q (z-score 10,5)                                                                                    |
| NIPT-04                             | Vulvar cancer, squamous cell carcinoma                         | Stage III | 161   | Targeted | Non-suspicious                                                                      | Score 0:<br>No suspicion                    | N/A                                                                                                                                                                                                                                   |
| <b>Haematological cancer (n=11)</b> |                                                                |           |       |          |                                                                                     |                                             |                                                                                                                                                                                                                                       |
| NIPT-31*                            | Hodgkin lymphoma                                               | Stage I   | 47    | GW       | Suspicious of a malignancy                                                          | Score: 5<br>Strong suspicion of malignancy  | Number of alterations: 9<br>dup2p( <i>REL</i> gene), dup5p, del6q                                                                                                                                                                     |
| NIPT-55                             | Hodgkin lymphoma                                               | Stage II  | 29    | GW       | Suspicious of a malignancy                                                          | Score: 7<br>Strong suspicion of malignancy  | Number of alterations: 8<br>M11, M13<br>T5, dup9p ( <i>JAK2</i> , <i>CD274</i> , <i>PDCD1LG2</i> genes)                                                                                                                               |
| NIPT-58*                            | Hodgkin lymphoma                                               | Stage II  | 38    | GW       | Suspicious of a malignancy                                                          | Score: 8<br>Strong suspicion of malignancy  | Number of alterations: 13<br>M7, M13<br>dup2p( <i>REL</i> gene), del6q ( <i>TNFAIP3</i> gene)<br>T5, T15, T18, T20<br>dup2p (z-score 13,0)                                                                                            |
| NIPT-64                             | Hodgkin lymphoma                                               | Stage II  | 29    | GW       | Suspicious of a malignancy                                                          | Score: 5<br>Strong suspicion of malignancy  | Number of alterations: 7<br>dup5p, dup9p ( <i>JAK2</i> , <i>CD274</i> , <i>PDCD1LG2</i> genes)                                                                                                                                        |
| NIPT-46*                            | Hodgkin lymphoma                                               | Stage III | 148   | GW       | Suspicious of a malignancy                                                          | Score: 7<br>Strong suspicion of malignancy  | Number of alterations: 16<br>M6, M15<br>dup2p( <i>REL</i> gene), dup5p, dup9p, ( <i>JAK2</i> , <i>CD274</i> , <i>PDCD1LG2</i> genes)<br>dup9p (z-score 16,7), (part)dup22q (z-score 11,9)                                             |
| NIPT-11                             | Hodgkin lymphoma                                               | Stage IV  | 57    | GW       | Suspicious of a malignancy                                                          | Score: 7<br>Strong suspicion of malignancy  | Number of alterations: 9<br>M4<br>dup2p( <i>REL</i> gene), dup5p, dup9p, ( <i>JAK2</i> , <i>CD274</i> , <i>PDCD1LG2</i> genes)                                                                                                        |
| NIPT-28*                            | Non Hodgkin lymphoma, primary mediastinal B-cell lymphoma      | Stage I   | 69    | GW       | Suspicious of a malignancy                                                          | Score: 12<br>Strong suspicion of malignancy | Number of alterations: 8<br>M15, M16<br>Chr 9 ( <i>JAK2</i> , <i>CD274</i> , <i>PDCD1LG2</i> genes)<br>T9, T12, T20                                                                                                                   |
| NIPT-30*                            | Non Hodgkin lymphoma, primary mediastinal B-cell lymphoma      | Stage I   | 41    | GW       | Suspicious of a malignancy                                                          | Score: 8<br>Strong suspicion of malignancy  | Number of alterations: 17<br>(part)dup2p( <i>REL</i> gene), T9 ( <i>JAK2</i> , <i>CD274</i> , <i>PDCD1LG2</i> genes)<br>T9<br>(part)dup2p(z-score 9.2), (part)dup3p(z-score 14.0), (part)dup8q(z-score 15.6),<br>dup18q z-score 10.5) |
| NIPT-57                             | Non Hodgkin lymphoma, diffuse large B-cell lymphoma            | Stage IV  | 56    | GW       | Suspicious of a malignancy                                                          | Score: 5<br>Strong suspicion of malignancy  | Number of alterations: 6<br>Recurrent CNVs seen in DLBCL and this NIPT: dup6p, dup7q, dup11q, dup18q, del6q (4).<br>Chr7 (z-score chr wide 22)                                                                                        |
| NIPT-62                             | Non Hodgkin, diffuse large B-cell lymphoma                     | Stage IV  | 193** | Targeted | Non-suspicious                                                                      | Score 0:<br>No suspicion                    | N/A                                                                                                                                                                                                                                   |
| NIPT-48                             | Lymphoma grey zone (Hodgkin and diffuse large B-cell lymphoma) | Stage III | 144   | GW       | Aberrant, other than suspicious of a malignancy (structural chromosomal aberration) | Score: 3<br>Strong suspicion of malignancy  | dup5p, dup9p ( <i>JAK2</i> , <i>CD274</i> , <i>PDCD1LG2</i> genes)<br>chr9 (z-score 11,4)                                                                                                                                             |

| <b>Melanoma (n=6)</b>              |                                                                               |           |                                               |          |                            |                                            |                                                                                                                                                 |
|------------------------------------|-------------------------------------------------------------------------------|-----------|-----------------------------------------------|----------|----------------------------|--------------------------------------------|-------------------------------------------------------------------------------------------------------------------------------------------------|
| NIPT-07                            | Melanoma                                                                      | Stage I   | 120                                           | GW       | Non-suspicious             | Score 0:<br>No suspicion                   | N/A                                                                                                                                             |
| NIPT-12                            | Melanoma                                                                      | Stage I   | 140                                           | Targeted | Non-suspicious             | Score 0:<br>No suspicion                   | N/A                                                                                                                                             |
| NIPT-25                            | Melanoma                                                                      | Stage I   | 150                                           | GW       | Non-suspicious             | Score 0:<br>No suspicion                   | N/A                                                                                                                                             |
| NIPT-51                            | Melanoma                                                                      | Stage II  | 155                                           | GW       | Non-suspicious             | Score 0:<br>No suspicion                   | N/A                                                                                                                                             |
| NIPT-49                            | Melanoma                                                                      | Stage III | 73                                            | GW       | Non-suspicious             | Score 0:<br>No suspicion                   | N/A                                                                                                                                             |
| NIPT-18                            | MELTUMP (melanocytic tumour of unknown malignant potential), Naevoid melanoma | Unknown   | Exact date of recurrence unknown (after NIPT) | Targeted | Non-suspicious             | Score 0:<br>No suspicion                   | N/A                                                                                                                                             |
| <b>Nasopharyngeal cancer (n=2)</b> |                                                                               |           |                                               |          |                            |                                            |                                                                                                                                                 |
| NIPT-52                            | Nasopharynx tumour, non-keratinizing                                          | Stage II  | 71                                            | GW       | Non-suspicious             | Score 0:<br>No suspicion                   | N/A                                                                                                                                             |
| NIPT-29                            | Nasopharynx tumour, sino nasal undifferentiated carcinoma                     | Stage IV  | 154                                           | GW       | Non-suspicious             | Score 0:<br>No suspicion                   | N/A                                                                                                                                             |
| <b>Thyroid cancer (n=2)</b>        |                                                                               |           |                                               |          |                            |                                            |                                                                                                                                                 |
| NIPT-17                            | Thyroid cancer, papillary subtype                                             | Stage III | 0                                             | GW       | Non-suspicious             | Score 0:<br>No suspicion                   | N/A                                                                                                                                             |
| NIPT-22                            | Thyroid cancer, papillary subtype                                             | Unknown   | 0                                             | GW       | Non-suspicious             | Score 0:<br>No suspicion                   | N/A                                                                                                                                             |
| <b>Other (n=5)</b>                 |                                                                               |           |                                               |          |                            |                                            |                                                                                                                                                 |
| NIPT-15*                           | Colorectal carcinoma, MSS                                                     | Stage IV  | 58                                            | GW       | Suspicious of a malignancy | Score: 9<br>Strong suspicion of malignancy | Number of alterations: 12<br>M4, M9, M14<br>CNVs frequently seen in MSS CRC and this NIPT; T7, T13, dup20q, del18p, del18q (5).<br>T2, T13, T20 |
| NIPT-38*                           | CUP midline with lymph node metastasis liver hilus                            | N/A       | 52                                            | Targeted | Suspicious of a malignancy | Score: 2<br>Mild suspicion                 | (prox)del13q, 27Mb                                                                                                                              |
| NIPT-13                            | Thymoma type B1                                                               | Stage IV  | 11                                            | GW       | Non-suspicious             | Score 0:<br>No suspicion                   | N/A                                                                                                                                             |
| NIPT-68                            | Bladder cancer, urothelial carcinoma                                          | Stage I   | 71                                            | GW       | Non-suspicious             | Score 0:<br>No suspicion                   | N/A                                                                                                                                             |
| NIPT-06                            | Meningioma                                                                    | Stage II  | 138                                           | GW       | Non-suspicious             | Score 0:<br>No suspicion                   | N/A                                                                                                                                             |

#Reviewed according to the “Maastricht criteria”. \*Patients also described in study population of our previous study (6). \*\*Postpartum diagnosis of cancer.

Abbreviations: Chr; chromosome, CNV; copy number variation, CRC; colorectal cancer, CUP; carcinoma of unknown primary, del; deletion, dup; duplication, GW; genome-wide, M; monosomy, MSS, microsatellite stable, N/A; not applicable, prox; proximal, T; trisomy.

**Supplemental Table 3: Symptoms of disease at diagnosis (n=65)**

| <b>Malignancy suspicious-NIPT*</b>                            | <b>Patients n=16</b> |
|---------------------------------------------------------------|----------------------|
| Symptoms                                                      | 6                    |
| Lymphadenopathy at physical examination                       | 3                    |
| Coughing, weight loss, less appetite                          | 1                    |
| Sore pelvis, lower back pain                                  | 1                    |
| Abnormal vaginal bleeding/discharge                           | 1                    |
| Asymptomatic                                                  | 7                    |
| Unknown                                                       | 3                    |
| <b>Non-suspicious NIPT</b>                                    | <b>Patients n=49</b> |
| Symptoms                                                      | 42                   |
| Abnormal vaginal bleeding/discharge and/or abnormal PAP smear | 15                   |
| Palpable mass/lesion/lymphadenopathy at physical examination  | 20                   |
| Dyspnoea                                                      | 1                    |
| Epistaxis                                                     | 1                    |
| Haematuria                                                    | 1                    |
| Intracerebral bleeding left frontal                           | 1                    |
| Unknown                                                       | 3                    |
| Asymptomatic                                                  | 1                    |
| Unknown                                                       | 6                    |

\*Strong suspicion of a maternal malignancy or mild suspicious of a maternal malignancy.

**Supplemental Figure 1: Highlighted WISECONDOR NIPT results:** All 22 autosomal chromosomes are displayed. For each chromosome, the vertical axis depicts the z-score, and the horizontal axis from left to right the 1 Mb-bins from p- to q-telomere. The vertical and horizontal axes are min-max normalized to a uniform height and width, respectively. The blue line represents the z-score per individual bin, the red line is the z-score using the windowed bin method (7). Dark purple bars represent called regions of at least 10 consecutive deviated bins by the windowed bin method. Dark green bars represent regions of at least 10 consecutive deviated bins called by the individual bin method. The light purple and light green bins have deviated z-scores by, respectively, the windowed bin or the individual bin method.

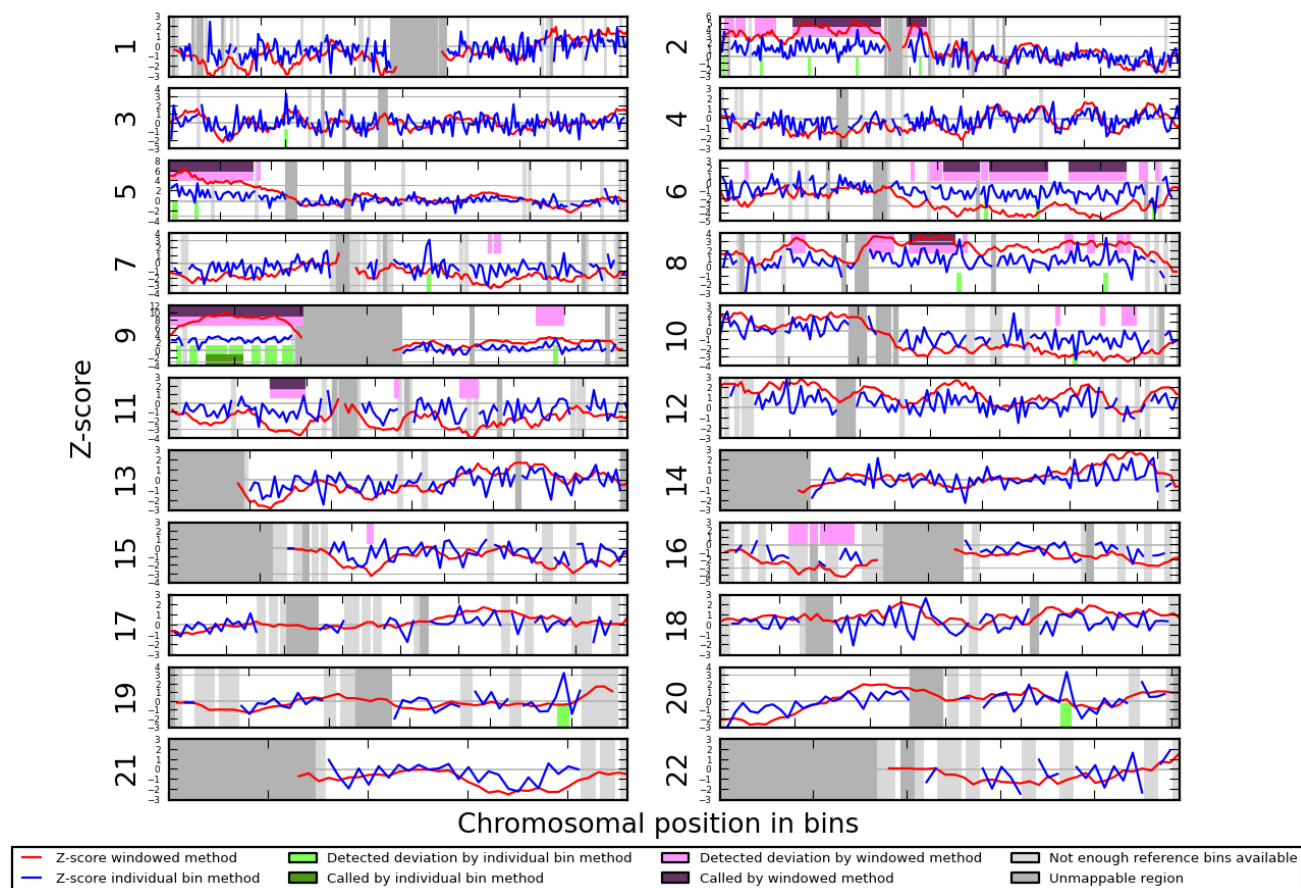

**Supplemental figure 1a:** Genome-wide NIPT analysis of a patient with a classic Hodgkin lymphoma, stage II (NIPT-64), with typical copy number variations that are frequently seen in patients with classic Hodgkin lymphoma (6).



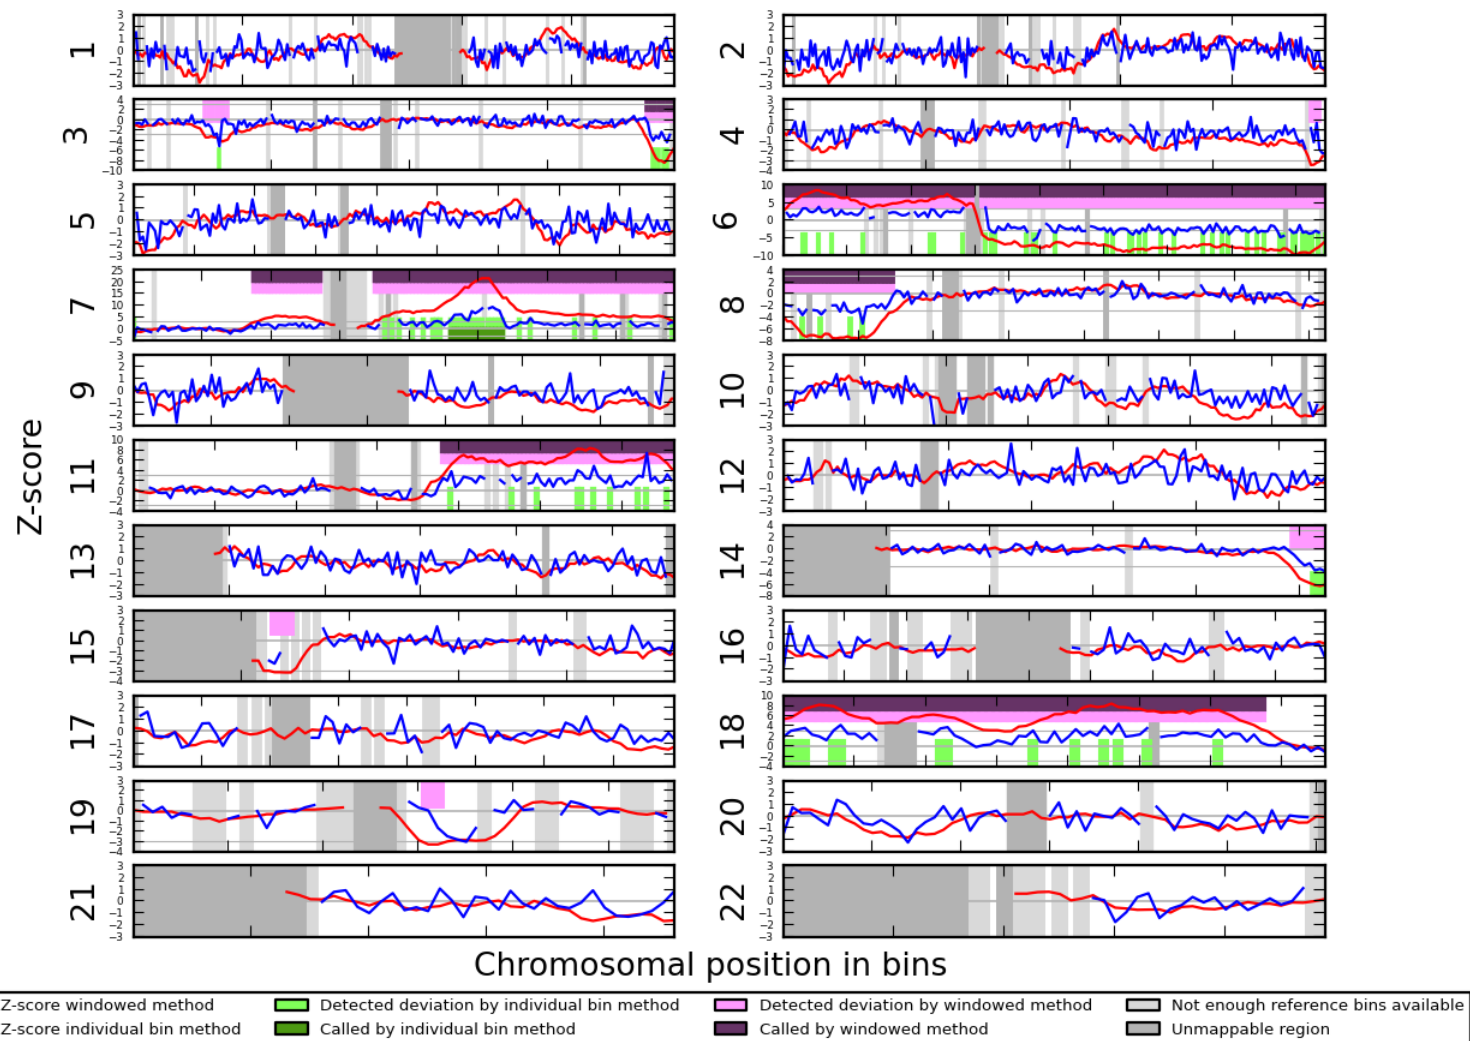

**Supplemental figure 1b:** Genome-wide NIPT analysis of a patient with a Non-Hodgkin lymphoma, diffuse large B-Cell lymphoma, stage IV (NIPT-57), with typical copy number variations that are frequently seen in patients with diffuse large B-cell lymphoma (4).

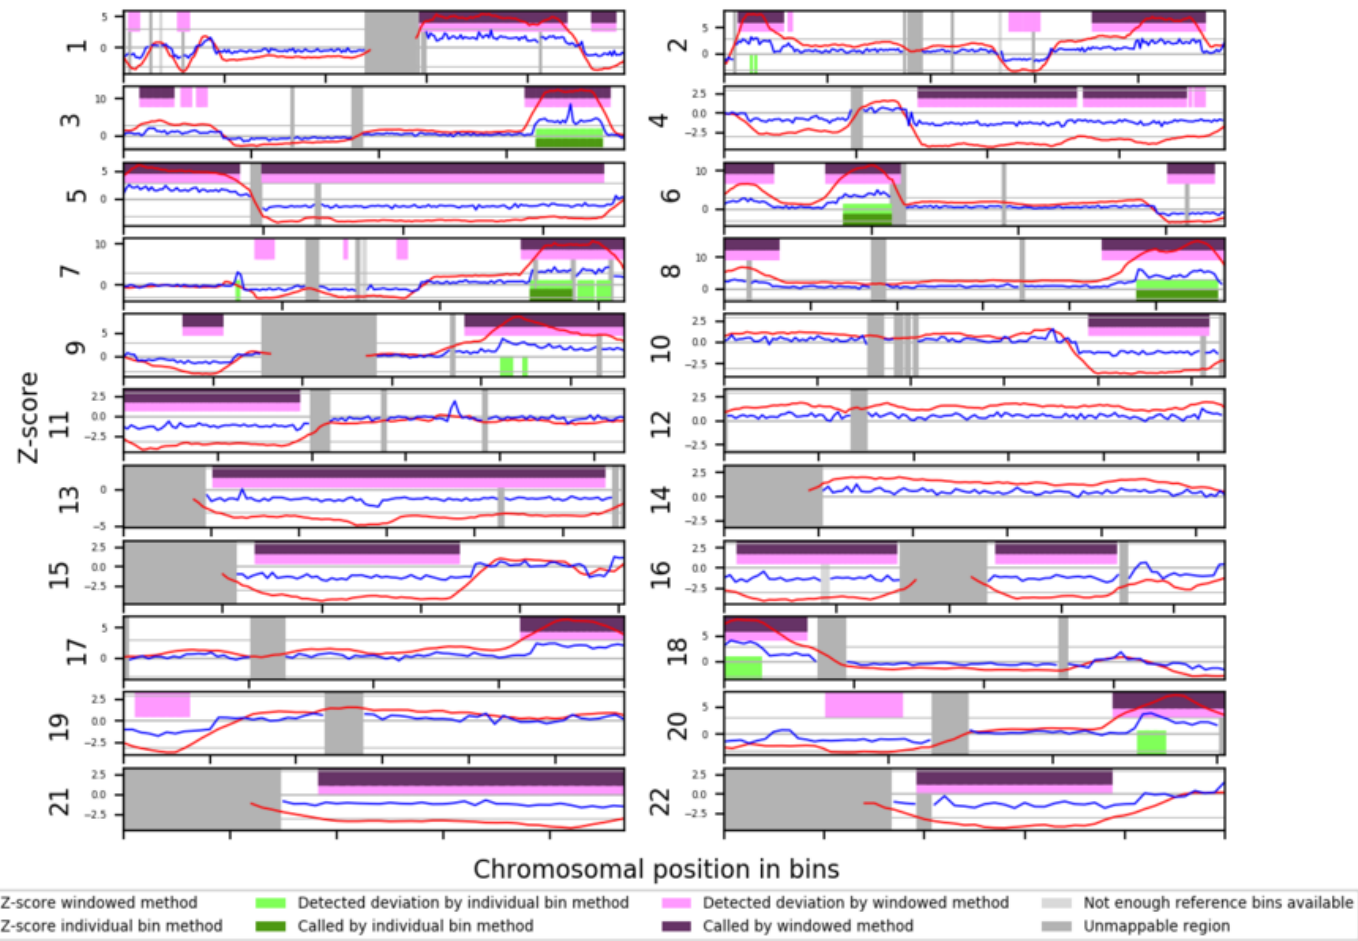

**Supplemental figure 1c:** Genome-wide NIPT analysis of a patient with ovarian cancer, stage III (NIPT-43), with typical copy number variations that are frequently seen in patients with ovarian cancer (3).

### Supplemental reference list

1. Heesterbeek CJ, Lenaerts L., Tjan-Heijnen V.C.G., Amant F., van Rij M.C., Theunis M., de Die-Smulders C.E.M., Vermeesch J.R., Macville M.V.E., The Dutch NIPT Consortium. Comprehensive recommendations for the clinical management of pregnant women with noninvasive prenatal test results suspicious of a maternal malignancy. *JCO Oncology Practice*. 2024.
2. Voutsadakis IA. 3q26 Amplifications in Cervical Squamous Carcinomas. *Curr Oncol*. 2021;28(4):2868-80.
3. Integrated genomic analyses of ovarian carcinoma. *Nature*. 2011;474(7353):609-15.
4. Chapuy B, Stewart C, Dunford AJ, Kim J, Kamburov A, Redd RA, et al. Molecular subtypes of diffuse large B cell lymphoma are associated with distinct pathogenic mechanisms and outcomes. *Nat Med*. 2018;24(5):679-90.
5. Ried T, Meijer GA, Harrison DJ, Grech G, Franch-Expósito S, Briffa R, et al. The landscape of genomic copy number alterations in colorectal cancer and their consequences on gene expression levels and disease outcome. *Mol Aspects Med*. 2019;69:48-61.
6. Heesterbeek CJ, Aukema SM, Galjaard RH, Boon EMJ, Srebniak MI, Bouman K, et al. Noninvasive Prenatal Test Results Indicative of Maternal Malignancies: A Nationwide Genetic and Clinical Follow-Up Study. *J Clin Oncol*. 2022:2426-35.
7. Straver R, Sistermans EA, Holstege H, Visser A, Oudejans CB, Reinders MJ. WISECONDOR: detection of fetal aberrations from shallow sequencing maternal plasma based on a within-sample comparison scheme. *Nucleic Acids Res*. 2014;42(5):e31.
